# Supplementary material
Source: Springer Nature journal article supplement (https://www.springermedizin.de/resource/supplementary/12916_2012_695_MOESM4_ESM.pdf/9598554)
Supplement: MOESM4 [file 9598554]

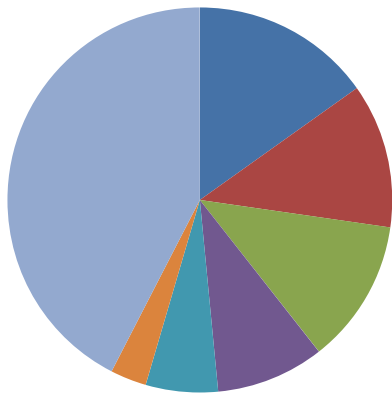

■ Huntington's Disease (5)

■ Hereditary Breast and Ovarian Cancer (4)

■ Hypercholesterolemia (4)

■ Hemochromatosis (3)

■ Colorectal cancer (2)

■ Hypertrophic cardiomyopathy (1)

■ Non specific studies, i.e. more than one condition (14)
